# Supplementary material
Source: publisher figshare collection journal article supplement (https://karger.figshare.com/articles/dataset/_/4564900)
Supplement: Supplementary file 1 [file 1]

**Supplementary table 2. Top-100 cited articles in neurology journals (first part of the analysis)**

| Rank | Article                                                                                                                                                                                                                           | No. of citations | No. of annual citations | No. of annual citations, rank |
|------|-----------------------------------------------------------------------------------------------------------------------------------------------------------------------------------------------------------------------------------|------------------|-------------------------|-------------------------------|
| 1    | McKhann G, Drachman D, Folstein M, et al. Clinical diagnosis of Alzheimer's disease. <i>Neurology</i> 1984;34:939-944.                                                                                                            | 18700            | 603.2                   | 1                             |
| 2    | Kurtzke JF. Rating neurologic impairment in multiple sclerosis: An expanded disability status scale (EDSS). <i>Neurology</i> 1983;33:1444-1452.                                                                                   | 6819             | 213.1                   | 10                            |
| 3    | Poser CM, Paty DW, Scheinberg L, et al. New diagnostic criteria for multiple sclerosis: Guidelines for research protocols. <i>Ann Neurol</i> 1983;13:227-231.                                                                     | 6307             | 197.1                   | 14                            |
| 4    | Hoehn MM, Yahr MD. Parkinsonism: onset, progression and mortality. <i>Neurology</i> 1967;17:427-442.                                                                                                                              | 6293             | 131.1                   | 33                            |
| 5    | Johns MW. A new method for measuring daytime sleepiness: the Epworth sleepiness scale. <i>Sleep</i> 1991;14:540-545.                                                                                                              | 5106             | 212.8                   | 11                            |
| 6    | Longa EZ, Weinstein PR, Carlson S, et al. Reversible middle cerebral artery occlusion without craniectomy in rats. <i>Stroke</i> 1989;20:84-91.                                                                                   | 4934             | 182.7                   | 17                            |
| 7    | Petersen RC, Smith GE, Waring SC, et al. Mild Cognitive Impairment Clinical Characterization and Outcome. <i>Arch Neurol</i> 1999;56:303-308.                                                                                     | 4138             | 258.6                   | 8                             |
| 8    | Hughes AJ, Daniel SE, Kilford L, et al. Accuracy of clinical diagnosis of idiopathic Parkinson's disease: a clinico-pathological study of 100 cases. <i>J Neurol Neurosurg Psychiatry</i> 1992;55:181-184.                        | 4046             | 175.9                   | 20                            |
| 9    | McDonald WI, Compston A, Edan G, et al. Recommended diagnostic criteria for multiple sclerosis: guidelines from the International Panel on the diagnosis of multiple sclerosis. <i>Ann Neurol</i> 2001;50:121-127.                | 3897             | 278.4                   | 5                             |
| 10   | Adams HP Jr, Bendixen BH, Kappelle LJ, et al. Classification of subtype of acute ischemic stroke. Definitions for use in a multicenter clinical trial. <i>Stroke</i> 1993;24:35-41.                                               | 3673             | 159.7                   | 25                            |
| 11   | Morris JC. The Clinical Dementia Rating (CDR): current version and scoring rules. <i>Neurology</i> 1993;43:2412-2414.                                                                                                             | 3283             | 149.2                   | 27                            |
| 12   | Cummings JL, Mega M, Gray K, et al. The Neuropsychiatric Inventory: comprehensive assessment of psychopathology in dementia. <i>Neurology</i> 1994;44:2308-2314.                                                                  | 3172             | 151                     | 26                            |
| 13   | Mirra SS, Heyman A, McKeel D, et al. The Consortium to Establish a Registry for Alzheimer's Disease (CERAD). Part II. Standardization of the neuropathologic assessment of Alzheimer's disease. <i>Neurology</i> 1991;41:479-486. | 3112             | 129.7                   | 34                            |
| 14   | Román GC, Tatemichi TK, Erkinjuntti T, et al. Vascular dementia: diagnostic criteria for research studies. Report of the NINDS-AIREN International Workshop. <i>Neurology</i> 1993;43:250-260.                                    | 3081             | 134                     | 32                            |

|    |                                                                                                                                                                                                                                        |      |       |    |
|----|----------------------------------------------------------------------------------------------------------------------------------------------------------------------------------------------------------------------------------------|------|-------|----|
| 15 | Neary D, Snowden JS, Gustafson L, et al. Frontotemporal lobar degeneration: a consensus on clinical diagnostic criteria. <i>Neurology</i> 1998;51:1546-1554.                                                                           | 2876 | 169.2 | 22 |
| 16 | Saunders AM, Strittmatter WJ, Schmechel D, et al. Association of apolipoprotein E allele epsilon 4 with late-onset familial and sporadic Alzheimer's disease. <i>Neurology</i> 1993;43:1467-1472.                                      | 2666 | 121.2 | 36 |
| 17 | Polman CH, Reingold SC, Edan G, et al. Diagnostic criteria for multiple sclerosis: 2005 revisions to the "McDonald Criteria". <i>Ann Neurol</i> 2005;58:840-846.                                                                       | 2637 | 263.7 | 7  |
| 18 | Wolf PA, Abbott RD, Kannel WB. Atrial fibrillation as an independent risk factor for stroke: the Framingham Study. <i>Stroke</i> 1991;22:983-988.                                                                                      | 2612 | 108.8 | 39 |
| 19 | McKeith IG, Galasko D, Kosaka K, et al. Consensus guidelines for the clinical and pathologic diagnosis of dementia with Lewy bodies (DLB): report of the consortium on DLB international workshop. <i>Neurology</i> 1996;47:1113-1124. | 2566 | 135.1 | 30 |
| 20 | Flemons WW, Buysse D, Redline S, et al. Sleep-related breathing disorders in adults: recommendations for syndrome definition and measurement techniques in clinical research. <i>Sleep</i> 1999;22:667-689.                            | 2386 | 149.1 | 28 |
| 21 | Petersen RC, Doody R, Kurz A, et al. Current concepts in mild cognitive impairment. <i>Arch Neurol</i> 2001;58:1985-1992.                                                                                                              | 2351 | 167.9 | 23 |
| 22 | Pulsinelli WA, Brierley JB, Plum F. Temporal profile of neuronal damage in a model of transient forebrain ischemia. <i>Ann Neurol</i> 1982;11:491-498.                                                                                 | 2347 | 71.1  | 57 |
| 23 | Wolpaw JR, Birbaumer N, McFarland DJ, et al. Brain-computer interfaces for communication and control. <i>Clin Neurophysiol</i> 2002;113:767-791.                                                                                       | 2311 | 177.8 | 18 |
| 24 | Pfurtscheller G, Lopes da Silva FH. Event-related EEG/MEG synchronization and desynchronization: basic principles. <i>Clin Neurophysiol</i> 1999;110:1842-1857.                                                                        | 2158 | 134.9 | 31 |
| 25 | van Swieten JC, Koudstaal PJ, Visser MC, et al. Interobserver agreement for the assessment of handicap in stroke patients. <i>Stroke</i> 1988;19:604-607.                                                                              | 2128 | 78.8  | 50 |
| 26 | Gallese V, Fadiga L, Fogassi L, et al. Action recognition in the premotor cortex. <i>Brain</i> 1996;119:593-609.                                                                                                                       | 2127 | 111.9 | 38 |
| 27 | Palisano R, Rosenbaum P, Walter S, et al. Development and reliability of a system to classify gross motor function in children with cerebral palsy. <i>Dev Med Child Neurol</i> 1997;39:214-223.                                       | 2109 | 117.2 | 37 |
| 28 | Rothman SM, Olney JW. Glutamate and the pathophysiology of hypoxic-ischemic brain damage. <i>Ann Neurol</i> 1986;19:105-111.                                                                                                           | 2075 | 69.2  | 60 |
| 29 | Terry RD, Masliah E, Salmon DP, et al. Physical basis of cognitive alterations in Alzheimer's disease: synapse loss is the major correlate of cognitive impairment. <i>Ann Neurol</i> 1991;30:572-580.                                 | 2068 | 86.2  | 48 |
| 30 | Lublin FD, Reingold SC. Defining the clinical course of multiple sclerosis: results of an international survey. <i>Neurology</i> 1996;46:907-911.                                                                                      | 2060 | 108.4 | 40 |

|    |                                                                                                                                                                                                                            |      |       |    |
|----|----------------------------------------------------------------------------------------------------------------------------------------------------------------------------------------------------------------------------|------|-------|----|
| 31 | Devinsky O, Morrell MJ, Vogt BA. Contributions of anterior cingulate cortex to behaviour. <i>Brain</i> 1995;118:279-306.                                                                                                   | 2021 | 96.2  | 45 |
| 32 | Khachaturian ZS. Diagnosis of Alzheimer's disease. <i>Arch Neurol</i> 1985;42:1097-1105.                                                                                                                                   | 2011 | 64.9  | 66 |
| 33 | Brott T, Adams HP Jr, Olinger CP, et al. Measurements of acute cerebral infarction: a clinical examination scale. <i>Stroke</i> 1989;20:864-870.                                                                           | 2007 | 77.2  | 54 |
| 34 | Morris JC, Heyman A, Mohs RC, et al. The Consortium to Establish a Registry for Alzheimer's Disease (CERAD). Part I. Clinical and neuropsychological assesment of Alzheimer's disease. <i>Neurology</i> 1989;39:1159-1165. | 2005 | 77.1  | 55 |
| 35 | Klunk WE, Engler H, Nordberg A, et al. Imaging brain amyloid in Alzheimer's disease with Pittsburgh Compound-B. <i>Ann Neurol</i> 2004;55:306-319.                                                                         | 1938 | 176.2 | 19 |
| 36 | Bederson JB, Pitts LH, Tsuji M, et al. Rat middle cerebral artery occlusion: evaluation of the model and development of a neurologic examination. <i>Stroke</i> 1986;17:472-476.                                           | 1926 | 66.4  | 63 |
| 37 | Phelps ME, Huang SC, Hoffman EJ, et al. Tomographic measurement of local cerebral glucose metabolic rate in humans with (F-18)2-fluoro-2-deoxy-D-glucose: validation of method. <i>Ann Neurol</i> 1979;6:371-388.          | 1921 | 53.4  | 77 |
| 38 | McKeith IG, Dickson DW, Lowe J, et al. Diagnosis and management of dementia with Lewy bodies: third report of the DLB Consortium. <i>Neurology</i> 2005;65:1863-1872.                                                      | 1899 | 189.9 | 16 |
| 39 | Pulsinelli WA, Brierley JB. A new model of bilateral hemispheric ischemia in the unanesthetized rat. <i>Stroke</i> 1979;10:267-272.                                                                                        | 1838 | 51.1  | 79 |
| 40 | Bernheimer H, Birkmayer W, Hornykiewicz O, et al. Brain dopamine and the syndromes of Parkinson and Huntington. Clinical, morphological and neurochemical correlations. <i>J Neurol Sci</i> 1973;20:415-455.               | 1804 | 43    | 88 |
| 41 | Krupp LB, LaRocca NG, Muir-Nash J, et al. The fatigue severity scale. Application to patients with multiple sclerosis and systemic lupus erythematosus. <i>Arch Neurol</i> 1989;46:1121-1123.                              | 1802 | 69.3  | 59 |
| 42 | Mori S, Crain BJ, Chacko VP, et al. Three-dimensional tracking of axonal projections in the brain by magnetic resonance imaging. <i>Ann Neurol</i> 1999;45:265-269.                                                        | 1797 | 105.7 | 42 |
| 43 | Geschwind N. Disconnexion syndromes in animals and man. I. <i>Brain</i> 1965;88:237-294.                                                                                                                                   | 1787 | 35.7  | 95 |
| 44 | Astrup J, Siesjö BK, Symon L. Thresholds in cerebral ischemia - the ischemic penumbra. <i>Stroke</i> 1981;12:723-725.                                                                                                      | 1729 | 50.9  | 80 |
| 45 | Jacobs LD, Cookfair DL, Rudick RA, et al. Intramuscular interferon beta-1a for disease progression in relapsing multiple sclerosis. <i>Ann Neurol</i> 1996;39:285-294.                                                     | 1726 | 90.8  | 46 |
| 46 | Gibb WR, Lees AJ. The relevance of the Lewy body to the pathogenesis of idiopathic Parkinson's disease. <i>J Neurol Neurosurg Psychiatry</i> 1988;51:745-752.                                                              | 1716 | 61.3  | 69 |

|    |                                                                                                                                                                                                                                                                                                    |      |       |    |
|----|----------------------------------------------------------------------------------------------------------------------------------------------------------------------------------------------------------------------------------------------------------------------------------------------------|------|-------|----|
| 47 | Mesulam MM. A cortical network for directed attention and unilateral neglect. <i>Ann Neurol</i> 1981;10:309-325.                                                                                                                                                                                   | 1639 | 48.2  | 84 |
| 48 | Dubois B, Feldman HH, Jacova C, et al. Research criteria for the diagnosis of Alzheimer's disease: revising the NINCDS-ADRDA criteria. <i>Lancet Neurol</i> 2007;6:734-746.                                                                                                                        | 1616 | 202   | 12 |
| 49 | Polich J. Updating P300: an integrative theory of P3a and P3b. <i>Clin Neurophysiol</i> 2007;118:2128-2148.                                                                                                                                                                                        | 1616 | 202   | 13 |
| 50 | McKhann GM, Knopman DS, Chertkow H, et al. The diagnosis of dementia due to Alzheimer's disease: recommendations from the National Institute on Aging-Alzheimer's Association workgroups on diagnostic guidelines for Alzheimer's disease. <i>Alzheimers Dement</i> 2011;7:263-269.                | 1566 | 391.5 | 2  |
| 51 | Lucchinetti C, Brück W, Parisi J, et al. Heterogeneity of multiple sclerosis lesions: implications for the pathogenesis of demyelination. <i>Ann Neurol</i> 2000;47:707-717.                                                                                                                       | 1547 | 103.1 | 43 |
| 52 | Mesulam MM. Large-scale neurocognitive networks and distributed processing for attention, language, and memory. <i>Ann Neurol</i> 1990;28:597-613.                                                                                                                                                 | 1529 | 61.2  | 70 |
| 53 | Allen RP, Picchietti D, Hening WA, et al. Restless legs syndrome: diagnostic criteria, special considerations, and epidemiology. A report from the restless legs syndrome diagnosis and epidemiology workshop at the National Institutes of Health. <i>Sleep Med</i> 2003;4:101-119.               | 1517 | 126.4 | 35 |
| 54 | Duquette P, Girard M, Despault L, et al. Interferon beta-1b is effective in relapsing-remitting multiple sclerosis. <i>Neurology</i> 1993;43:655-661.                                                                                                                                              | 1511 | 68.7  | 61 |
| 55 | Fearnley JM, Lees AJ. Ageing and Parkinson's disease: substantia nigra regional selectivity. <i>Brain</i> 1991;114:2283-2301.                                                                                                                                                                      | 1475 | 61.5  | 68 |
| 56 | Cavanna AE, Trimble MR. The precuneus: a review of its functional anatomy and behavioural correlates. <i>Brain</i> 2006;129:564-583.                                                                                                                                                               | 1466 | 162.9 | 24 |
| 57 | Cummings JL. Frontal-subcortical circuits and human behavior. <i>Arch Neurol</i> 1993;50:873-880.                                                                                                                                                                                                  | 1435 | 65.2  | 65 |
| 58 | Navia BA, Jordan BD, Price RW. The AIDS dementia complex: I. Clinical features. <i>Ann Neurol</i> 1986;19:517-524.                                                                                                                                                                                 | 1409 | 48.6  | 83 |
| 59 | Rice JE 3rd, Vannucci RC, Brierley JB. The influence of immaturity on hypoxic-ischemic brain damage in the rat. <i>Ann Neurol</i> 1981;9:131-141.                                                                                                                                                  | 1409 | 40.3  | 91 |
| 60 | Polman CH, Reingold SC, Banwell B, et al. Diagnostic criteria for multiple sclerosis: 2010 revisions to the McDonald criteria. <i>Ann Neurol</i> 2011;69:292-302.                                                                                                                                  | 1391 | 278.2 | 6  |
| 61 | Adams HP Jr, del Zoppo G, Alberts MJ, et al. Guidelines for the Early Management of Adults With Ischemic Stroke. <i>Stroke</i> 2007;38:1655-1711.                                                                                                                                                  | 1376 | 172   | 21 |
| 62 | Albert MS, DeKosky ST, Dickson D, et al. The diagnosis of mild cognitive impairment due to Alzheimer's disease: recommendations from the National Institute on Aging-Alzheimer's Association workgroups on diagnostic guidelines for Alzheimer's disease. <i>Alzheimers Dement</i> 2011;7:270-279. | 1374 | 343.5 | 3  |

|    |                                                                                                                                                                                                                                                                                      |      |       |    |
|----|--------------------------------------------------------------------------------------------------------------------------------------------------------------------------------------------------------------------------------------------------------------------------------------|------|-------|----|
| 63 | Johnson MA, Polgar J, Weightman D, et al. Data on the distribution of fibre types in thirty-six human muscles. An autopsy study. J Neurol Sci 1973;18:111-129.                                                                                                                       | 1369 | 31.8  | 96 |
| 64 | Tomlinson BE, Blessed G, Roth M. Observations on the brains of demented old people. J Neurol Sci 1970;11:205-242.                                                                                                                                                                    | 1364 | 30.3  | 97 |
| 65 | Arriagada PV, Growdon JH, Hedley-Whyte ET, et al. Neurofibrillary tangles but not senile plaques parallel duration and severity of Alzheimer's disease. Neurology 1992;42:631-639.                                                                                                   | 1336 | 58.1  | 75 |
| 66 | Gelb DJ, Oliver E, Gilman S. Diagnostic criteria for Parkinson disease. Arch Neurol 1999;56:33-39.                                                                                                                                                                                   | 1336 | 78.6  | 51 |
| 67 | McGeer PL, Itagaki S, Boyes BE, et al. Reactive microglia are positive for HLA-DR in the substantia nigra of Parkinson's and Alzheimer's disease brains. Neurology 1988;38:1285-1291.                                                                                                | 1322 | 49    | 81 |
| 68 | Wingerchuk DM, Lennon VA, Pittock SJ, et al. Revised diagnostic criteria for neuromyelitis optica. Neurology 2006;66:1485-1459.                                                                                                                                                      | 1317 | 146.3 | 29 |
| 69 | Warrington EK, Shallice T. Category specific semantic impairments. Brain 1984;107:829-854.                                                                                                                                                                                           | 1300 | 40.6  | 89 |
| 70 | Buccino G, Binkofski F, Fink GR, et al. Action observation activates premotor and parietal areas in a somatotopic manner: an fMRI study. Eur J Neurosci 2001;13:400-404.                                                                                                             | 1297 | 86.5  | 47 |
| 71 | Zarranz JJ, Alegre J, Gómez-Esteban JC, et al. The new mutation, E46K, of alpha-synuclein causes Parkinson and Lewy body dementia. Ann Neurol 2004;55:164-173.                                                                                                                       | 1281 | 106.8 | 41 |
| 72 | Brooks BR, Miller RG, Swash M, et al. El Escorial revisited: revised criteria for the diagnosis of amyotrophic lateral sclerosis. Amyotroph Lateral Scler Other Motor Neuron Disord 2000;1:293-299.                                                                                  | 1256 | 78.5  | 52 |
| 73 | Whitehouse PJ, Price DL, Clark AW, et al. Alzheimer disease: evidence for selective loss of cholinergic neurons in the nucleus basalis. Ann Neurol 1981;10:122-126.                                                                                                                  | 1251 | 36.8  | 94 |
| 74 | Snider WD, Simpson DM, Nielsen S, et al. Neurological complications of acquired immune deficiency syndrome: analysis of 50 patients. Ann Neurol 1983;14:403-418.                                                                                                                     | 1249 | 37.8  | 92 |
| 75 | Sperling RA, Aisen PS, Beckett LA, et al. Toward defining the preclinical stages of Alzheimer's disease: recommendations from the National Institute on Aging-Alzheimer's Association workgroups on diagnostic guidelines for Alzheimer's disease. Alzheimers Dement 2011;7:280-292. | 1243 | 310.8 | 4  |
| 76 | NIH consensus Conference. Neurofibromatosis. Conference statement. National Institutes of Health Consensus Development Conference. Arch Neurol 1988;45:575-578.                                                                                                                      | 1242 | 46    | 86 |
| 77 | Selmaj KW, Raine CS. Tumor necrosis factor mediates myelin and oligodendrocyte damage in vitro. Ann Neurol 1988;23:339-346.                                                                                                                                                          | 1230 | 45.6  | 87 |

|    |                                                                                                                                                                                                                                                                          |      |       |     |
|----|--------------------------------------------------------------------------------------------------------------------------------------------------------------------------------------------------------------------------------------------------------------------------|------|-------|-----|
| 78 | Johnson KP, Brooks BR, Cohen JA, et al. Copolymer 1 reduces relapse rate and improves disability in relapsing-remitting multiple sclerosis. <i>Neurology</i> 1995;45:1268-1276.                                                                                          | 1221 | 61.1  | 71  |
| 79 | Hebert LE, Scherr PA, Bienias JL, et al. Alzheimer disease in the US population: prevalence estimates using the 2000 census. <i>Arch Neurol</i> 2003;60:1119-1122.                                                                                                       | 1217 | 101.4 | 44  |
| 80 | Dubois B, Slachevsky A, Litvan I, et al. The FAB: a Frontal Assessment Battery at bedside. <i>Neurology</i> 2000;55:1621-1626.                                                                                                                                           | 1199 | 79.9  | 49  |
| 81 | Brun A, Englund B, Gustafson L, et al. Clinical and neuropathological criteria for frontotemporal dementia. The Lund and Manchester Groups. <i>J Neurol Neurosurg Psychiatry</i> 1994;57:416-418.                                                                        | 1198 | 57    | 76  |
| 82 | Mesulam MM. From sensation to cognition. <i>Brain</i> 1998;121:1013-1052.                                                                                                                                                                                                | 1186 | 69.8  | 58  |
| 83 | Navia BA, Cho ES, Petito CK, et al. The AIDS dementia complex: II. Neuropathology. <i>Ann Neurol</i> 1986;19:525-535.                                                                                                                                                    | 1175 | 40.5  | 90  |
| 84 | Geschwind N, Galaburda AM. Cerebral lateralization. Biological mechanisms, associations, and pathology: I. A hypothesis and a program for research. <i>Arch Neurol</i> 1985;42:428-459.                                                                                  | 1169 | 37.7  | 93  |
| 85 | Schmahmann JD, Sherman JC. The cerebellar cognitive affective syndrome. <i>Brain</i> 1998;121:561-579.                                                                                                                                                                   | 1168 | 68.7  | 62  |
| 86 | Jack CR Jr, Knopman DS, Jagust WJ, et al. Hypothetical model of dynamic biomarkers of the Alzheimer's pathological cascade. <i>Lancet Neurol</i> 2010;9:119-128.                                                                                                         | 1165 | 194.2 | 15  |
| 87 | Jones EG, Powell TP. An anatomical study of converging sensory pathways within the cerebral cortex of the monkey. <i>Brain</i> 1970;93:793-820.                                                                                                                          | 1164 | 25.3  | 100 |
| 88 | Petersen RC, Stevens JC, Ganguli M, et al. Practice parameter: early detection of dementia: mild cognitive impairment (an evidence-based review). Report of the Quality Standards Subcommittee of the American Academy of Neurology. <i>Neurology</i> 2001;56:1133-1142. | 1161 | 77.4  | 53  |
| 89 | Engel J Jr. A proposed diagnostic scheme for people with epileptic seizures and with epilepsy: report of the ILAE Task Force on Classification and Terminology. <i>Epilepsia</i> 2001;42:796-803.                                                                        | 1148 | 76.5  | 56  |
| 90 | Litvan I, Agid Y, Calne D, et al. Clinical research criteria for the diagnosis of progressive supranuclear palsy (Steele-Richardson-Olszewski syndrome): report of the NINDS-SPSP international workshop. <i>Neurology</i> 1996;47:1-9.                                  | 1135 | 59.7  | 73  |
| 91 | Chen R, Classen J, Gerloff C, et al. Depression of motor cortex excitability by low-frequency transcranial magnetic stimulation. <i>Neurology</i> 1997;48:1398-1403.                                                                                                     | 1125 | 62.5  | 67  |
| 92 | Diener HC, Cunha L, Forbes C, et al. European Stroke Prevention Study. 2. Dipyridamole and acetylsalicylic acid in the secondary prevention of stroke. <i>J Neurol Sci</i> 1996;143:1-13.                                                                                | 1122 | 59.1  | 74  |

|     |                                                                                                                                                                                                                              |      |       |    |
|-----|------------------------------------------------------------------------------------------------------------------------------------------------------------------------------------------------------------------------------|------|-------|----|
| 93  | Hodges JR, Patterson K, Oxbury S, et al. Semantic dementia. Progressive fluent aphasia with temporal lobe atrophy. Brain 1992;115:1783-1806.                                                                                 | 1121 | 48.7  | 82 |
| 94  | Berg AT, Berkovic SF, Brodie MJ, et al. Revised terminology and concepts for organization of seizures and epilepsies: report of the ILAE Commission on Classification and Terminology, 2005-2009. Epilepsia 2010;51:676-685. | 1114 | 222.8 | 9  |
| 95  | Lovell MA, Robertson JD, Teesdale WJ, et al. Copper, iron and zinc in Alzheimer's disease senile plaques. J Neurol Sci 1998;158:47-52.                                                                                       | 1110 | 65.3  | 64 |
| 96  | Rao SM, Leo GJ, Bernardin L, et al. Cognitive dysfunction in multiple sclerosis. I. Frequency, patterns, and prediction. Neurology 1991;41:685-691.                                                                          | 1107 | 46.1  | 85 |
| 97  | Buschke H, Fuld PA. Evaluating storage, retention, and retrieval in disordered memory and learning. Neurology 1974;24:1019-1025.                                                                                             | 1103 | 26.9  | 99 |
| 98  | Rogers SL, Farlow MR, Doody RS, et al. A 24-week, double-blind, placebo-controlled trial of donepezil in patients with Alzheimer's disease. Neurology 1998;50:136-145.                                                       | 1099 | 61.1  | 72 |
| 99  | Lindstrom JM, Seybold ME, Lennon VA, et al. Antibody to acetylcholine receptor in myasthenia gravis. Prevalence, clinical correlates, and diagnostic value. Neurology 1976;26:1054-1059.                                     | 1097 | 28.1  | 98 |
| 100 | Brooks BR. El Escorial World Federation of Neurology criteria for the diagnosis of amyotrophic lateral sclerosis. J Neurol Sci 1994;124:96-107.                                                                              | 1097 | 52.2  | 78 |
