# Supplementary material
Source: publisher figshare collection journal article supplement (https://karger.figshare.com/articles/dataset/_/4564900)
Supplement: Supplementary file 2 [file 1]

**Supplementary table 3. Top-100 cited original articles influencing neurological practice (second part of the analysis)**

| Rank | Article                                                                                                                                                                                                                                                                   | No. of citations | No. of annual citations | No. of annual citations, rank |
|------|---------------------------------------------------------------------------------------------------------------------------------------------------------------------------------------------------------------------------------------------------------------------------|------------------|-------------------------|-------------------------------|
| 1    | Marler JR, Brott T, Broderick J, et al. Tissue Plasminogen Activator for Acute Ischemic Stroke. <i>N Engl J Med</i> 1995;333:1581-1588.                                                                                                                                   | 5182             | 259.1                   | 2                             |
| 2    | Taylor DW, Barnett HJM. Beneficial effect of carotid endarterectomy in symptomatic patients with high-grade carotid stenosis. <i>N Engl J Med</i> 1991;325:445-453.                                                                                                       | 4021             | 167.5                   | 10                            |
| 3    | Gent M, Beaumont D, Blanchard J, et al. A randomised, blinded, trial of clopidogrel versus aspirin in patients at risk of ischaemic events (CAPRIE). <i>Lancet</i> 1996;348:1329-1339.                                                                                    | 3375             | 177.6                   | 8                             |
| 4    | O'Leary DH, Polak JF, Kronmal RA, et al. Carotid-artery intima and media thickness as a risk factor for myocardial infarction and stroke in older adults. <i>N Engl J Med</i> 1999;340:14-22.                                                                             | 2862             | 168.4                   | 9                             |
| 5    | MacMahon S, Peto R, Cutler J, et al. Blood pressure, stroke, and coronary heart disease. Part 1, Prolonged differences in blood pressure: prospective observational studies corrected for the regression dilution bias. <i>Lancet</i> 1990;335:765-774.                   | 2847             | 113.9                   | 23                            |
| 6    | Walker MD, Marler JR, Goldstein M, et al. Endarterectomy for Asymptomatic Carotid Artery Stenosis. <i>JAMA</i> 1995;273:1421-1428.                                                                                                                                        | 2752             | 137.6                   | 15                            |
| 7    | Saunders AM, Strittmatter WJ, Schmechel D, et al. Association of apolipoprotein E allele epsilon 4 with late-onset familial and sporadic Alzheimer's disease. <i>Neurology</i> 1993;43:1467-1472.                                                                         | 2666             | 121.2                   | 20                            |
| 8    | Wolf PA, Abbott RD, Kannel WB. Atrial fibrillation as an independent risk factor for stroke: the Framingham Study. <i>Stroke</i> 1991;22:983-988.                                                                                                                         | 2612             | 108.8                   | 26                            |
| 9    | Go AS, Hylek EM, Phillips KA, et al. Prevalence of diagnosed atrial fibrillation in adults: national implications for rhythm management and stroke prevention: the AnTicoagulation and Risk Factors in Atrial Fibrillation (ATRIA) Study. <i>JAMA</i> 2001;285:2370-2375. | 2507             | 179.1                   | 6                             |
| 10   | Bernard SA, Gray TW, Buist MD, et al. Treatment of comatose survivors of out-of-hospital cardiac arrest with induced hypothermia. <i>N Engl J Med</i> 2002;346:557-563.                                                                                                   | 2502             | 178.7                   | 7                             |
| 11   | Trapp BD, Peterson J, Ransohoff RM, et al. Axonal transection in the lesions of multiple sclerosis. <i>N Engl J Med</i> 1998;338:278-285.                                                                                                                                 | 2445             | 135.8                   | 16                            |
| 12   | Probstfield JL. Prevention of stroke by antihypertensive drug treatment in older persons with isolated systolic hypertension. Final results of the Systolic Hypertension in the Elderly Program (SHEP). <i>JAMA</i> 1991;265:3255-3264.                                   | 2382             | 99.3                    | 32                            |

|    |                                                                                                                                                                                                                                                                                        |      |       |    |
|----|----------------------------------------------------------------------------------------------------------------------------------------------------------------------------------------------------------------------------------------------------------------------------------------|------|-------|----|
| 13 | Davies P, Maloney AJ. Selective loss of central cholinergic neurons in Alzheimer's disease. <i>Lancet</i> 1976;2:1403.                                                                                                                                                                 | 2381 | 61.1  | 64 |
| 14 | Ferri CP, Prince M, Brayne C, et al. Global prevalence of dementia: a Delphi consensus study. <i>Lancet</i> 2005;366:2112-2117.                                                                                                                                                        | 2254 | 225.4 | 3  |
| 15 | Hacke W, Kaste M, Bluhmki E, et al. Thrombolysis with alteplase 3 to 4.5 hours after acute ischemic stroke. <i>N Engl J Med</i> 2008;359:1317-1329.                                                                                                                                    | 2221 | 317.3 | 1  |
| 16 | Holzer M, Cerchiari E, Martens P, et al. Mild therapeutic hypothermia to improve the neurologic outcome after cardiac arrest. <i>N Engl J Med</i> 2002;346:549-556.                                                                                                                    | 2161 | 154.4 | 11 |
| 17 | Gage BF, Waterman AD, Shannon W, et al. Validation of clinical classification schemes for predicting stroke: results from the National Registry of Atrial Fibrillation. <i>JAMA</i> 2001;285:2864-2870.                                                                                | 2054 | 146.7 | 13 |
| 18 | Hacke W, Kaste M, Fieschi C, et al. Intravenous thrombolysis with recombinant tissue plasminogen activator for acute hemispheric stroke. The European Cooperative Acute Stroke Study (ECASS). <i>JAMA</i> 1995;274:1017-1025.                                                          | 2016 | 100.8 | 31 |
| 19 | Dormandy JA, Charbonnel B, Eckland DJ, et al. Secondary prevention of macrovascular events in patients with type 2 diabetes in the PROactive Study (PROspective pioglitAzone Clinical Trial In macroVascular Events): a randomised controlled trial. <i>Lancet</i> 2005;366:1279-1289. | 1913 | 191.3 | 5  |
| 20 | Furlan A, Higashida R, Wechsler L, et al. Intra-arterial prourokinase for acute ischemic stroke. The PROACT II study: a randomized controlled trial. <i>JAMA</i> 1999;282:2003-2011.                                                                                                   | 1912 | 119.5 | 21 |
| 21 | Bamford J, Sandercock P, Dennis M, et al. Classification and natural history of clinically identifiable subtypes of cerebral infarction. <i>Lancet</i> 1991;337:1521-1526.                                                                                                             | 1851 | 77.1  | 47 |
| 22 | Barnett HJ, Taylor DW, Eliasziw M, et al. Benefit of carotid endarterectomy in patients with symptomatic moderate or severe stenosis. <i>N Engl J Med</i> 1998;339:1415-1425.                                                                                                          | 1843 | 108.4 | 27 |
| 23 | Barker AT, Jalinous R, Freeston IL. Non-invasive magnetic stimulation of human motor cortex. <i>Lancet</i> 1985;1:1106-1107.                                                                                                                                                           | 1824 | 60.8  | 67 |
| 24 | Seshadri S, Beiser A, Selhub J, et al. Plasma homocysteine as a risk factor for dementia and Alzheimer's disease. <i>N Engl J Med</i> 2002;346:476-483.                                                                                                                                | 1821 | 130.1 | 18 |
| 25 | Osame M, Usuku K, Izumo S, et al. HTLV-I associated myelopathy, a new clinical entity. <i>Lancet</i> 1986;1:1031-1032.                                                                                                                                                                 | 1758 | 60.6  | 69 |
| 26 | Warlow C. MRC European Carotid Surgery Trial: interim results for symptomatic patients with severe (70-99%) or with mild (0-29%) carotid stenosis. <i>Lancet</i> 1991;337:1235-1243.                                                                                                   | 1732 | 72.2  | 55 |

|    |                                                                                                                                                                                                                                                    |      |       |    |
|----|----------------------------------------------------------------------------------------------------------------------------------------------------------------------------------------------------------------------------------------------------|------|-------|----|
| 27 | Jacobs LD, Cookfair DL, Rudick RA, et al. Intramuscular interferon beta-1a for disease progression in relapsing multiple sclerosis. <i>Ann Neurol</i> 1996;39:285-294.                                                                             | 1726 | 90.8  | 38 |
| 28 | Will RG, Ironside JW, Zeidler M, et al. A new variant of Creutzfeldt-Jakob disease in the UK. <i>Lancet</i> 1996;347:921-925.                                                                                                                      | 1724 | 90.7  | 39 |
| 29 | Kwan P, Brodie MJ. Early identification of refractory epilepsy. <i>N Engl J Med</i> 2000;342:314-319.                                                                                                                                              | 1711 | 106.9 | 28 |
| 30 | Sano M, Ernesto C, Thomas RG, et al. A controlled trial of selegiline, alpha-tocopherol, or both as treatment for Alzheimer's disease. <i>N Engl J Med</i> 1997;336:1216-1222.                                                                     | 1643 | 91.3  | 37 |
| 31 | MacMahon S, Neal B, Tzourio C, et al. Randomised trial of a perindopril-based blood-pressure-lowering regimen among 6,105 individuals with previous stroke or transient ischaemic attack. <i>Lancet</i> 2001;358:1033-1041.                        | 1613 | 115.2 | 22 |
| 32 | Inouye SK, van Dyck CH, Alessi CA, et al. Clarifying confusion: the confusion assessment method. A new method for detection of delirium. <i>Ann Intern Med</i> 1990;113:941-948.                                                                   | 1593 | 63.7  | 62 |
| 33 | Hacke W, Kaste M, Fieschi C, et al. Randomised double-blind placebo-controlled trial of thrombolytic therapy with intravenous alteplase in acute ischaemic stroke (ECASS II). <i>Lancet</i> 1998;352:1245-1251.                                    | 1559 | 91.7  | 36 |
| 34 | Wilhelmsen L, Svärdsudd K, Korsan-Bengtson K, et al. Fibrinogen as a risk factor for stroke and myocardial infarction. <i>N Engl J Med</i> 1984;311:501-505.                                                                                       | 1557 | 50.2  | 77 |
| 35 | Laupacis A, Boysen G, Connolly S, et al. Risk factors for stroke and efficacy of antithrombotic therapy in atrial fibrillation. Analysis of pooled data from five randomized controlled trials. <i>Arch Intern Med</i> 1994;154:1449-1457.         | 1542 | 73.4  | 53 |
| 36 | Hinchey J, Chaves C, Appignani B, et al. A reversible posterior leukoencephalopathy syndrome. <i>N Engl J Med</i> 1996;334:494-500.                                                                                                                | 1514 | 75.7  | 51 |
| 37 | Duquette P, Girard M, Despault L, et al. Interferon beta-1b is effective in relapsing-remitting multiple sclerosis. <i>Neurology</i> 1993;43:655-661.                                                                                              | 1511 | 68.7  | 57 |
| 38 | Snowdon DA, Greiner LH, Mortimer JA, et al. Brain infarction and the clinical expression of Alzheimer disease. The Nun Study. <i>JAMA</i> 1997;277:813-817.                                                                                        | 1499 | 83.3  | 44 |
| 39 | Evans DA, Funkenstein HH, Albert MS, et al. Prevalence of Alzheimer's disease in a community population of older persons. Higher than previously reported. <i>JAMA</i> 1989;262:2551-2556.                                                         | 1480 | 56.9  | 74 |
| 40 | Petersen P, Boysen G, Godtfredsen J, et al. Placebo-controlled, randomised trial of warfarin and aspirin for prevention of thromboembolic complications in chronic atrial fibrillation. The Copenhagen AFASAK study. <i>Lancet</i> 1989;1:175-179. | 1441 | 53.4  | 76 |

|    |                                                                                                                                                                                                                                          |      |       |    |
|----|------------------------------------------------------------------------------------------------------------------------------------------------------------------------------------------------------------------------------------------|------|-------|----|
| 41 | Farrell B, Fraser A, Sandercock P, et al. Randomised trial of endarterectomy for recently symptomatic carotid stenosis: final results of the MRC European Carotid Surgery Trial (ECST). <i>Lancet</i> 1998;351:1379-1387.                | 1439 | 84.6  | 43 |
| 42 | Hacke W, Donnan G, Fieschi C, et al. Association of outcome with early stroke treatment: pooled analysis of ATLANTIS, ECASS, and NINDS rt-PA stroke trials. <i>Lancet</i> 2004;363:768-774.                                              | 1403 | 127.5 | 19 |
| 43 | Graham IM, Daly LE, Refsum HM, et al. Plasma homocysteine as a risk factor for vascular disease. The European Concerted Action Project. <i>JAMA</i> 1997;277:1775-1781.                                                                  | 1397 | 77.6  | 46 |
| 44 | Freed CR, Greene PE, Breeze RE, et al. Transplantation of embryonic dopamine neurons for severe Parkinson's disease. <i>N Engl J Med</i> 2001;344:710-719.                                                                               | 1384 | 98.9  | 33 |
| 45 | Tomlinson BE, Blessed G, Roth M. Observations on the brains of demented old people. <i>J Neurol Sci</i> 1970;11:205-242.                                                                                                                 | 1364 | 30.3  | 95 |
| 46 | Arriagada PV, Growdon JH, Hedley-Whyte ET, et al. Neurofibrillary tangles but not senile plaques parallel duration and severity of Alzheimer's disease. <i>Neurology</i> 1992;42:631-639.                                                | 1336 | 58.1  | 73 |
| 47 | Crum RM, Anthony JC, Bassett SS, et al. Population-based norms for the Mini-Mental State Examination by age and educational level. <i>JAMA</i> 1993;269:2386-2391.                                                                       | 1336 | 60.7  | 68 |
| 48 | Zola-Morgan S, Squire LR, Amaral DG. Human amnesia and the medial temporal region: enduring memory impairment following a bilateral lesion limited to field CA1 of the hippocampus. <i>J Neurosci</i> 1986;6:2950-2967.                  | 1335 | 46    | 83 |
| 49 | Polman CH, O'Connor PW, Havrdova E, et al. A randomized, placebo-controlled trial of natalizumab for relapsing multiple sclerosis. <i>N Engl J Med</i> 2006;354:899-910.                                                                 | 1324 | 147.1 | 12 |
| 50 | Ebers GC, Rice G, Lesaux J, et al. Randomised double-blind placebo-controlled study of interferon beta-1a in relapsing/remitting multiple sclerosis. <i>Lancet</i> 1998;352:1498-1504.                                                   | 1310 | 77.1  | 48 |
| 51 | Bhatt DL, Fox KA, Hacke W, et al. Clopidogrel and aspirin versus aspirin alone for the prevention of atherothrombotic events. <i>N Engl J Med</i> 2006;354:1706-1717.                                                                    | 1282 | 142.4 | 14 |
| 52 | Whitehouse PJ, Price DL, Clark AW, et al. Alzheimer disease: evidence for selective loss of cholinergic neurons in the nucleus basalis. <i>Ann Neurol</i> 1981;10:122-126.                                                               | 1251 | 36.8  | 90 |
| 53 | Snider WD, Simpson DM, Nielsen S, et al. Neurological complications of acquired immune deficiency syndrome: analysis of 50 patients. <i>Ann Neurol</i> 1983;14:403-418.                                                                  | 1249 | 39    | 89 |
| 54 | Halliday A, Mansfield A, Marro J, et al. Prevention of disabling and fatal strokes by successful carotid endarterectomy in patients without recent neurological symptoms: randomised controlled trial. <i>Lancet</i> 2004;363:1491-1502. | 1241 | 112.8 | 24 |

|    |                                                                                                                                                                                                                                                                 |      |       |    |
|----|-----------------------------------------------------------------------------------------------------------------------------------------------------------------------------------------------------------------------------------------------------------------|------|-------|----|
| 55 | Lennon VA, Wingerchuk DM, Kryzer TJ, et al. A serum autoantibody marker of neuromyelitis optica: distinction from multiple sclerosis. <i>Lancet</i> 2004;364:2106-2112.                                                                                         | 1231 | 111.9 | 25 |
| 56 | Tang MX, Jacobs D, Stern Y, et al. Effect of oestrogen during menopause on risk and age at onset of Alzheimer's disease. <i>Lancet</i> 1996;348:429-432.                                                                                                        | 1230 | 64.7  | 60 |
| 57 | Johnson KP, Brooks BR, Cohen JA et al. Copolymer 1 reduces relapse rate and improves disability in relapsing-remitting multiple sclerosis. <i>Neurology</i> 1995;45:1268-1276.                                                                                  | 1221 | 61.1  | 65 |
| 58 | Hebert LE, Scherr PA, Bienias JL, et al. Alzheimer disease in the US population: prevalence estimates using the 2000 census. <i>Arch Neurol</i> 2003;60:1119-1122.                                                                                              | 1217 | 101.4 | 30 |
| 59 | Amarenco P, Bogousslavsky J, Callahan A 3rd, et al. High-dose atorvastatin after stroke or transient ischemic attack. <i>N Engl J Med</i> 2006;355:549-559.                                                                                                     | 1208 | 134.2 | 17 |
| 60 | Navia BA, Cho ES, Petito CK, et al. The AIDS dementia complex: II. Neuropathology. <i>Ann Neurol</i> 1986;19:525-535.                                                                                                                                           | 1175 | 40.5  | 87 |
| 61 | Schmahmann JD, Sherman JC. The cerebellar cognitive affective syndrome. <i>Brain</i> 1998;121:561-579.                                                                                                                                                          | 1168 | 68.7  | 58 |
| 62 | Shumaker SA, Legault C, Rapp SR, et al. Estrogen plus progestin and the incidence of dementia and mild cognitive impairment in postmenopausal women: the Women's Health Initiative Memory Study: a randomized controlled trial. <i>JAMA</i> 2003;289:2651-2662. | 1167 | 97.3  | 35 |
| 63 | Wiebe S, Blume WT, Girvin JP, et al. A randomized, controlled trial of surgery for temporal-lobe epilepsy. <i>N Engl J Med</i> 2001;345:311-318.                                                                                                                | 1157 | 82.6  | 45 |
| 64 | Jick H, Zornberg GL, Jick SS, et al. Statins and the risk of dementia. <i>Lancet</i> 2000;356:1627-1631.                                                                                                                                                        | 1145 | 76.3  | 50 |
| 65 | Padgett BL, Walker DL, ZuRhein GM, et al. Cultivation of papova-like virus from human brain with progressive multifocal leucoencephalopathy. <i>Lancet</i> 1971;1:1257-1260.                                                                                    | 1141 | 25.9  | 99 |
| 66 | Roach GW, Kanchuger M, Mangano CM, et al. Adverse cerebral outcomes after coronary bypass surgery. <i>N Engl J Med</i> 1996;335:1857-1863.                                                                                                                      | 1141 | 60.1  | 70 |
| 67 | Kish SJ, Shannak K, Hornykiewicz O. Uneven pattern of dopamine loss in the striatum of patients with idiopathic Parkinson's disease. Pathophysiologic and clinical implications. <i>N Engl J Med</i> 1988;318:876-880.                                          | 1140 | 42.2  | 86 |
| 68 | Diener HC, Cunha L, Forbes C, et al. European Stroke Prevention Study. 2. Dipyridamole and acetylsalicylic acid in the secondary prevention of stroke. <i>J Neurol Sci</i> 1996;143:1-13.                                                                       | 1122 | 59.1  | 71 |
| 69 | Salonen JT, Ylä-Herttuala S, Yamamoto R, et al. Autoantibody against oxidised LDL and progression of carotid atherosclerosis. <i>Lancet</i> 1992;339:883-887.                                                                                                   | 1116 | 48.5  | 79 |
| 70 | Rao SM, Leo GJ, Bernardin L, et al. Cognitive dysfunction in multiple sclerosis. I. Frequency, patterns, and prediction. <i>Neurology</i> 1991;41:685-691.                                                                                                      | 1107 | 46.1  | 82 |

|    |                                                                                                                                                                                                                                                                                     |      |       |     |
|----|-------------------------------------------------------------------------------------------------------------------------------------------------------------------------------------------------------------------------------------------------------------------------------------|------|-------|-----|
| 71 | Rogers SL, Farlow MR, Doody RS, et al. A 24-week, double-blind, placebo-controlled trial of donepezil in patients with Alzheimer's disease. <i>Neurology</i> 1998;50:136-145.                                                                                                       | 1099 | 61.1  | 66  |
| 72 | Lindstrom JM, Seybold ME, Lennon VA, et al. Antibody to acetylcholine receptor in myasthenia gravis. Prevalence, clinical correlates, and diagnostic value. <i>Neurology</i> 1976;26:1054-1059.                                                                                     | 1097 | 28.1  | 97  |
| 73 | DE Renzi E, Vignolo LA. et al. The token test: A sensitive test to detect receptive disturbances in aphasics. <i>Brain</i> 1962;85:665-678.                                                                                                                                         | 1093 | 20.6  | 100 |
| 74 | Limousin P, Krack P, Pollak P, et al. Electrical stimulation of the subthalamic nucleus in advanced Parkinson's disease. <i>N Engl J Med</i> 1998;339:1105-1111.                                                                                                                    | 1092 | 64.2  | 61  |
| 75 | McLean CA, Cherny RA, Fraser FW, et al. Soluble pool of Abeta amyloid as a determinant of severity of neurodegeneration in Alzheimer's disease. <i>Ann Neurol</i> 1999;46:860-866.                                                                                                  | 1090 | 68.1  | 59  |
| 76 | Diener HC, Bogousslavsky J, Brass LM, et al. Aspirin and clopidogrel compared with clopidogrel alone after recent ischaemic stroke or transient ischaemic attack in high-risk patients (MATCH): randomised, double-blind, placebo-controlled trial. <i>Lancet</i> 2004;364:331-337. | 1080 | 98.2  | 34  |
| 77 | Lipton RB, Stewart WF, Diamond S, et al. Prevalence and burden of migraine in the United States: data from the American Migraine Study II. <i>Headache</i> 2001;41:646-657.                                                                                                         | 1059 | 75.6  | 52  |
| 78 | Levy RM, Bredesen DE, Rosenblum ML. Neurological manifestations of the acquired immunodeficiency syndrome (AIDS): experience at UCSF and review of the literature. <i>J Neurosurg</i> 1985;62:475-495.                                                                              | 1058 | 35.3  | 93  |
| 79 | Krack P, Batir A, Van Blercom N, et al. Five-year follow-up of bilateral stimulation of the subthalamic nucleus in advanced Parkinson's disease. <i>N Engl J Med</i> 2003;349:1925-1934.                                                                                            | 1052 | 87.7  | 41  |
| 80 | Bensimon G, Lacomblez L, Meininger V. A controlled trial of riluzole in amyotrophic lateral sclerosis. <i>N Engl J Med</i> 1994;330:585-591.                                                                                                                                        | 1052 | 50.1  | 78  |
| 81 | Stewart WF, Lipton RB, Celentano DD, et al. Prevalence of migraine headache in the United States. Relation to age, income, race, and other sociodemographic factors. <i>JAMA</i> 1992;267:64-69.                                                                                    | 1050 | 45.7  | 84  |
| 82 | Sandercock P, Collins R, Counsell C, et al. The International Stroke Trial (IST): a randomised trial of aspirin, subcutaneous heparin, both, or neither among 19 435 patients with acute ischaemic stroke. <i>Lancet</i> 1997;349:1569-1581.                                        | 1048 | 58.2  | 72  |
| 83 | Wolozin B, Kellman W, Ruosseau P, et al. Decreased prevalence of Alzheimer disease associated with 3-hydroxy-3-methylglutaryl coenzyme A reductase inhibitors. <i>Arch Neurol</i> 2000;57:1439-1443.                                                                                | 1044 | 69.6  | 56  |
| 84 | Yaggi HK, Concato J, Kernan WN, et al. Obstructive sleep apnea as a risk factor for stroke and death. <i>N Engl J Med</i> 2005;353:2034-2041.                                                                                                                                       | 1042 | 104.2 | 29  |

|     |                                                                                                                                                                                                                                        |      |       |    |
|-----|----------------------------------------------------------------------------------------------------------------------------------------------------------------------------------------------------------------------------------------|------|-------|----|
| 85  | Vermeer SE, Prins ND, den Heijer T, et al. Silent brain infarcts and the risk of dementia and cognitive decline. <i>N Engl J Med</i> 2003;348:1215-1222.                                                                               | 1035 | 86.3  | 42 |
| 86  | Rosen WG, Terry RD, Fuld PA, et al. Pathological verification of ischemic score in differentiation of dementias. <i>Ann Neurol</i> 1980;7:486-488.                                                                                     | 1028 | 29.4  | 96 |
| 87  | Summers WK, Majovski LV, Marsh GM, et al. Oral tetrahydroaminoacridine in long-term treatment of senile dementia, Alzheimer type. <i>N Engl J Med</i> 1986;315:1241-1245.                                                              | 1026 | 35.4  | 92 |
| 88  | Paty DW, Li DKB, Duquette P, et al. Interferon beta-1b is effective in relapsing-remitting multiple sclerosis. <i>Neurology</i> 1993;43:662-667.                                                                                       | 1025 | 46.6  | 80 |
| 89  | Koudstaal PJ, Dehaene I, Dhooghe M, et al. Secondary prevention in non-rheumatic atrial fibrillation after transient ischaemic attack or minor stroke. <i>Lancet</i> 1993;342:1255-1262.                                               | 1024 | 46.5  | 81 |
| 90  | Morris JC, Storandt M, Miller JP, et al. Mild cognitive impairment represents early-stage Alzheimer disease. <i>Arch Neurol</i> 2001;58:397-405.                                                                                       | 1016 | 72.6  | 54 |
| 91  | DeKosky ST, Scheff SW. Synapse loss in frontal cortex biopsies in Alzheimer's disease: correlation with cognitive severity. <i>Ann Neurol</i> 1990;27:457-464.                                                                         | 1013 | 40.5  | 88 |
| 92  | Hauser WA, Annegers JF, Kurland LT. Incidence of epilepsy and unprovoked seizures in Rochester, Minnesota: 1935-1984. <i>Epilepsia</i> 1993;34:453-468.                                                                                | 999  | 45.4  | 85 |
| 93  | Inouye SK, Bogardus ST Jr, Charpentier PA, et al. A multicomponent intervention to prevent delirium in hospitalized older patients. <i>N Engl J Med</i> 1999;340:669-676.                                                              | 994  | 62.1  | 63 |
| 94  | Ohayon MM. Epidemiology of insomnia: what we know and what we still need to learn. <i>Sleep Med Rev</i> 2002;6:97-111.                                                                                                                 | 993  | 76.4  | 49 |
| 95  | Lechat P, Mas JL, Lascault G, et al. Prevalence of patent foramen ovale in patients with stroke. <i>N Engl J Med</i> 1988;318:1148-1152.                                                                                               | 992  | 36.7  | 91 |
| 96  | Gluckman PD, Wyatt JS, Azzopardi D, et al. Selective head cooling with mild systemic hypothermia after neonatal encephalopathy: multicentre randomised trial. <i>Lancet</i> 2005;365:663-670.                                          | 991  | 90.1  | 40 |
| 97  | Brott TG, Hobson RW 2nd, Howard G, et al. Stenting versus endarterectomy for treatment of carotid-artery stenosis. <i>N Engl J Med</i> 2010;363:11-23.                                                                                 | 984  | 196.8 | 4  |
| 98  | Ho DD, Rota TR, Schooley RT, et al. Isolation of HTLV-III from cerebrospinal fluid and neural tissues of patients with neurologic syndromes related to the acquired immunodeficiency syndrome. <i>N Engl J Med</i> 1985;313:1493-1497. | 982  | 32.7  | 94 |
| 99  | Mohr JP, Caplan LR, Melski JW, et al. The Harvard Cooperative Stroke Registry. <i>Neurology</i> 1978;28:754-762                                                                                                                        | 980  | 26.5  | 98 |
| 100 | Ferguson B, Matyszak MK, Esiri MM, et al. Axonal damage in acute multiple sclerosis lesions. <i>Brain</i> 1997;120:393-399.                                                                                                            | 976  | 54.2  | 75 |
