# Supplementary material
Source: publisher figshare collection journal article supplement (https://karger.figshare.com/articles/dataset/_/4564900)
Supplement: Supplementary file 3 [file 1]

**Supplementary table 1. Fifty selected clinical neurology journals for the first part of the analysis**

| Rank | Journal name                                    | Abbreviated journal name | ISSN      | Impact factor in 2014 |
|------|-------------------------------------------------|--------------------------|-----------|-----------------------|
| 1    | Lancet Neurology                                | Lancet Neurol            | 1474-4422 | 21.896                |
| 2    | Nature Review Neurology                         | Nat Rev Neurol           | 1759-4758 | 15.358                |
| 3    | Alzheimer'S & Dementia                          | Alzheimers Dement        | 1552-5260 | 12.407                |
| 4    | Annals Of Neurology                             | Ann Neurol               | 0364-5134 | 9.977                 |
| 5    | Brain                                           | Brain                    | 0006-8950 | 9.196                 |
| 6    | Sleep Medicine Reviews                          | Sleep Med Rev            | 1087-0792 | 8.513                 |
| 7    | Neurology                                       | Neurology                | 0028-3878 | 8.185                 |
| 8    | Archives Of Neurology                           | Arch Neurol-Chicago      | 0003-9942 | 7.419                 |
| 9    | Jama Neurology                                  | Jama Neurol              | 2168-6149 | 7.271                 |
| 10   | Journal Of Neurology, Neurosurgery & Psychiatry | J Neurol Neurosur Ps     | 0022-3050 | 6.807                 |
| 11   | Neuro-Oncology                                  | Neuro-Oncology           | 1522-8517 | 6.776                 |
| 12   | Stroke                                          | Stroke                   | 0039-2499 | 5.761                 |
| 13   | Movement Disorders                              | Movement Disord          | 0885-3185 | 5.68                  |
| 14   | Current Opinion In Neurology                    | Curr Opin Neurol         | 1350-7540 | 5.307                 |
| 15   | Neurotherapeutics                               | Neurotherapeutics        | 1933-7213 | 5.054                 |
| 16   | Cephalalgia                                     | Cephalalgia              | 0333-1024 | 4.891                 |
| 17   | Multiple Sclerosis Journal                      | Mult Scler J             | 1352-4585 | 4.822                 |
| 18   | Sleep                                           | Sleep                    | 0161-8105 | 4.591                 |
| 19   | Epilepsia                                       | Epilepsia                | 0013-9580 | 4.571                 |
| 20   | European Journal Of Neurology                   | Eur J Neurol             | 1351-5101 | 4.055                 |
| 21   | Alzheimer'S Research & Therapy                  | Alzheimers Res Ther      | 1758-9193 | 3.979                 |
| 22   | Parkinsonism & Related Disorders                | Parkinsonism Relat D     | 1353-8020 | 3.972                 |
| 23   | Current Alzheimer Research Journal              | Curr Alzheimer Res       | 1567-2050 | 3.889                 |
| 24   | Cerebrovascular Diseases                        | Cerebrovasc Dis          | 1015-9770 | 3.754                 |
| 25   | Dementia And Geriatric Cognitive Disorder       | Dement Geriatr Cogn      | 1420-8008 | 3.547                 |
| 26   | Neurodegenerative Diseases                      | Neurodegener Dis         | 1660-2854 | 3.511                 |
| 27   | Developmental Medicine & Child Neurology        | Dev Med Child Neurol     | 0012-1622 | 3.51                  |
| 28   | Journal Of Neurology                            | J Neurol                 | 0340-5354 | 3.377                 |

|    |                                                               |                      |           |       |
|----|---------------------------------------------------------------|----------------------|-----------|-------|
| 29 | Journal Of Sleep Research                                     | J Sleep Res          | 0962-1105 | 3.347 |
| 30 | Journal Of Neurodevelopmental Disorders                       | J Neurodev Disord    | 1866-1947 | 3.268 |
| 31 | Epilepsy Currents                                             | Epilepsy Curr        | 1535-7597 | 3.256 |
| 32 | Sleep Medicine                                                | Sleep Med            | 1389-9457 | 3.154 |
| 33 | Therapeutic Advances In Neurological Disorders                | Ther Adv Neurol Diso | 1756-2856 | 3.14  |
| 34 | Clinical Neurophysiology                                      | Clin Neurophysiol    | 1388-2457 | 3.097 |
| 35 | Journal Of Neuro-Oncology                                     | J Neuro-Oncol        | 0167-594X | 3.07  |
| 36 | Current Neurology And Neuroscience Reports                    | Curr Neurol Neurosci | 1528-4042 | 3.059 |
| 37 | Journal Of Clinical Sleep Medicine                            | J Clin Sleep Med     | 1550-9389 | 3.053 |
| 38 | Neurogenetics                                                 | Neurogenetics        | 1364-6745 | 2.884 |
| 39 | The Journal Of Headache And Pain                              | J Headache Pain      | 1129-2369 | 2.801 |
| 40 | Headache                                                      | Headache             | 0017-8748 | 2.758 |
| 41 | Journal Of The Peripheral Nervous System                      | J Peripher Nerv Syst | 1085-9489 | 2.758 |
| 42 | Neuromuscular Disorders                                       | Neuromuscular Disord | 0960-8966 | 2.638 |
| 43 | Journal Of The Neurological Sciences                          | J Neurol Sci         | 0022-510X | 2.474 |
| 45 | Alzheimer Disease & Associated Disorders                      | Alz Dis Assoc Dis    | 0893-0341 | 2.44  |
| 46 | Neurocritical Care                                            | Neurocrit Care       | 1541-6933 | 2.44  |
| 47 | Amyotrophic Lateral Sclerosis And Frontotemporal Degeneration | Amyotroph Lat Scl Fr | 2167-8421 | 2.405 |
| 48 | Acta Neurologica Scandinavica                                 | Acta Neurol Scand    | 0001-6314 | 2.395 |
| 49 | Muscle & Nerve                                                | Muscle Nerve         | 0148-639X | 2.283 |
| 50 | Epilepsy & Behavior                                           | Epilepsy Behav       | 1525-5050 | 2.257 |
