# Supplementary material
Source: publisher figshare collection journal article supplement (https://karger.figshare.com/articles/dataset/_/4564900)
Supplement: Supplementary file 4 [file 1]

**Supplementary table 4. Authors associated with articles identified as citation classics. Only authors associated with three or more articles are listed**

| First part of the analysis |               |                          |                                                                      | Second part of the analysis |           |                          |                                                                      |
|----------------------------|---------------|--------------------------|----------------------------------------------------------------------|-----------------------------|-----------|--------------------------|----------------------------------------------------------------------|
| Rank                       | Author        | No. of citation classics | Types of author association according to number of citation classics | Rank                        | Author    | No. of citation classics | Types of author association according to number of citation classics |
| 1                          | Mesulam MM    | 6                        | first = 3, corresponding = 3                                         | 1                           | Hacke W   | 7                        | first = 4, corresponding = 3                                         |
| 2                          | Petersen RC   | 5                        | first = 3, corresponding = 2                                         | 2                           | Inouye SK | 4                        | first = 2, corresponding = 2                                         |
| 3                          | Brooks BR     | 4                        | first = 2, corresponding = 2                                         | 3                           | Diener HC | 3                        | first = 2, corresponding = 1                                         |
| 4                          | Cummings JL   | 4                        | first = 2, corresponding = 2                                         | 4                           | Marler JR | 3                        | first = 1, corresponding = 2                                         |
| 5                          | Dubois B      | 4                        | first = 2, corresponding = 2                                         | 5                           | Wolf PA   | 3                        | first = 1, corresponding = 2                                         |
| 6                          | Geschwind N   | 4                        | first = 2, corresponding = 2                                         |                             |           |                          |                                                                      |
| 7                          | McKeith IG    | 4                        | first = 2, corresponding = 2                                         |                             |           |                          |                                                                      |
| 8                          | Polman CH     | 4                        | first = 2, corresponding = 2                                         |                             |           |                          |                                                                      |
| 9                          | Pulsinelli WA | 4                        | first = 2, corresponding = 2                                         |                             |           |                          |                                                                      |
| 10                         | Morris JC     | 4                        | first = 3, corresponding = 1                                         |                             |           |                          |                                                                      |
| 11                         | Neary D       | 3                        | first = 1, corresponding = 2                                         |                             |           |                          |                                                                      |
